## CORRECTION

# Correction: Rule-Based Design of Plant Expression Vectors Using GenoCAD

Anna Coll, Mandy L. Wilson, Kristina Gruden, Jean Peccoud

The following information is missing from the Competing interests section: Jean Peccoud holds a financial interest in GenoCAD and serves as the company's CEO. This affiliation does not alter the authors' adherence to all the PLOS ONE policies on sharing data and materials.

GenoCAD did not provide any funding for this study and was not involved in the design of the research, the collection of data, or the preparation of the manuscript.

## Reference

1. Coll A, Wilson ML, Gruden K, Peccoud J (2015) Rule-Based Design of Plant Expression Vectors Using GenoCAD. PLoS ONE 10(7): e0132502. doi:[10.1371/journal.pone.0132502](https://doi.org/10.1371/journal.pone.0132502) PMID: [26148190](https://pubmed.ncbi.nlm.nih.gov/26148190/)

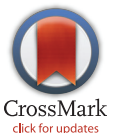

## OPEN ACCESS

**Citation:** Coll A, Wilson ML, Gruden K, Peccoud J (2015) Correction: Rule-Based Design of Plant Expression Vectors Using GenoCAD. PLoS ONE 10(8): e0136004. doi:[10.1371/journal.pone.0136004](https://doi.org/10.1371/journal.pone.0136004)

**Published:** August 13, 2015

**Copyright:** © 2015 Coll et al. This is an open access article distributed under the terms of the [Creative Commons Attribution License](https://creativecommons.org/licenses/by/4.0/), which permits unrestricted use, distribution, and reproduction in any medium, provided the original author and source are credited.
